# Supplementary material for: Multiple teaching methods in undergraduate surgical training: a blended style may be the optimal choice!
Source: Frontiers journal article supplement (doi:10.3389/feduc.2023.1200879), 2023-08-03
Supplement: Table_1.docx [file Table_1.docx]

**Supplementary Table 1.** Summary of teaching methods applied in different stages of medical education for undergraduate students

| **Teaching method** | **Advantages** | **Disadvantages** | **Refs.** |
| --- | --- | --- | --- |
| Lecture-based learning | A quick, inexpensive, and efficient way of introducing complex educational material; brilliant speakers can give highly stimulating lectures, which can be an active mode of learning. | Received passively by students; highly dependent on educational materials and skills, experience, and availability of the lecturer; insufficient analysis, limited spatial visual conversion ability, and poor practical application. | (1-4) |
| Case-based learning | Promotes self-learning by enhancing relevance, concept understanding, and problem-solving skills; cultivates students’ rigorous logical reasoning; integrates basic biomedical knowledge and its application to concrete patient cases and clinical case management; improves student motivation, satisfaction, and engagement. | Its utility may be limited in a large lecture environment. | (1, 5, 6) |
| Team-based learning | Combines active and collaborative learning; helps students achieve course objectives and learn how to function in teams; reports high levels of student engagement and interaction in class as well as fostering individual accountability and promoting teamwork behaviors. | Requires students to study before class. | (7) |
| Problem-based learning | Enhances active learning and students’ intrinsic motivation; students solve problems through self-study, research, discussion, and cooperation within small groups. | Uses non-directive tutors. | (8, 9) |
| The flipped-classroom model | Improves academic outcomes, class attendance, student satisfaction, and instructor time management; may help students acquire suturing skills in different domains; blends strengths of Internet-driven instruction outside the classroom (e.g., digital videos, self-regulated learning, online discussions) and face-to-face instruction inside the classroom (e.g., collaborative study, applied problem-solving, instructor and peer engagement); offers advantages over direct observations of surgical skills and clinical performance in terms of objectivity, time-efficiency, and feasibility. | Requires a considerable amount of time, faculty members must prepare materials, and high costs | (10, 11) |
| Simulation-based training | Incorporates basic technical-skill task simulators and animated laboratories to teach basic operative skills and procedures; improves reflective capacity and communication skills; offers a reliable, proven, and affordable means of teaching multiple aspects of pediatric surgical clinical practice; superior learning than from textbooks. | Fidelity; financial barriers; surgical simulation studies are often inadequately powered owing to great heterogeneity; effective use of simulation requires all main factors: training resources, trained educators, and curricular institutionalization. | (12-17) |
| Augmented reality (AR) | Provides live representation of real-world environment; perspicuity and dependability; short training time and high usability and acceptance | Utility of AR applications is limited when task demands are low; suitable for specific task requirements; physical pressure for participants (weight>500 g); tissue disruption throughout the case. | (18-22) |
| “Hand as Foot” teaching | Combines changes of limb bones with orthopedic clinical teaching and advantages of metonymy and simulation in teaching; stimulates students’ interest and improves their active-thinking abilities; increases teaching/learning efficiency; enhances self-worth, identity, and medical responsibility. | - | (23, 24) |

**References**:

1. Zhao W, He L, Deng W, Zhu J, Su A, Zhang Y. The effectiveness of the combined problem-based learning (PBL) and case-based learning (CBL) teaching method in the clinical practical teaching of thyroid disease. BMC Med Educ. 2020;20(1):381.

2. Chotiyarnwong P, Boonnasa W, Chotiyarnwong C, Unnanuntana A. Video-based learning versus traditional lecture-based learning for osteoporosis education: a randomized controlled trial. Aging Clin Exp Res. 2021;33(1):125-31.

3. Nawabi S, Bilal R, Javed MQ. Team-based learning versus Traditional lecture-based learning: An investigation of students' perceptions and academic achievements. Pak J Med Sci. 2021;37(4):1080-5.

4. Wang Q, Li Z, Huang X, Fu X, Li Q, Li H. Step-by-Step Method Combined with Simulation-Enhanced Learner Outcomes in Minimally Invasive Breast Surgery Education. Adv Med Educ Pract. 2022;13:1051-60.

5. Muthukrishnan SP, Chandran DS, Afreen N, Bir M, Dastidar SG, Jayappa H, et al. Planning, implementation, and evaluation of multicomponent, case-based learning for first-year Indian medical undergraduates. Adv Physiol Educ. 2019;43(4):504-11.

6. Pearson SC, Eddlemon T, Kirkwood M, Pate A. Are fishbowl activities effective for teaching pharmacotherapy and developing postformal thought in pharmacy students? A pilot study. Curr Pharm Teach Learn. 2018;10(8):1070-5.

7. Anas S, Kyrou I, Rand-Weaver M, Karteris E. The effect of online and in-person team-based learning (TBL) on undergraduate endocrinology teaching during COVID-19 pandemic. BMC Med Educ. 2022;22(1):120.

8. Yao P, OuYang J, Liu C, Wang S, Wang X, Sun S. Improving burn surgery education for medical students in China. Burns. 2020;46(3):647-51.

9. Dolmans D, Loyens SMM, Marcq H, Gijbels D. Deep and surface learning in problem-based learning: a review of the literature. Adv Health Sci Educ Theory Pract. 2016;21(5):1087-112.

10. Hernandez-Guerra M, Quintero E, Morales-Arraez DE, Carrillo-Pallares A, Nicolas-Perez D, Carrillo-Palau M, et al. Comparison of flipped learning and traditional lecture method for teaching digestive system diseases in undergraduate medicine: A prospective non-randomized controlled trial. Med Teach. 2021;43(4):463-71.

11. Tune JD, Sturek M, Basile DP. Flipped classroom model improves graduate student performance in cardiovascular, respiratory, and renal physiology. Adv Physiol Educ. 2013;37(4):316-20.

12. Acton RD, Chipman JG, Gilkeson J, Schmitz CC. Synthesis versus imitation: evaluation of a medical student simulation curriculum via Objective Structured Assessment of Technical Skill. J Surg Educ. 2010;67(3):173-8.

13. Nataraja RM, Oo YM, Ljuhar D, Webb NR, Pacilli M, Win NN, et al. Overview of a novel paediatric surgical simulation-based medical education programme in Myanmar. ANZ J Surg. 2020;90(10):1925-32.

14. Plana NM, Rifkin WJ, Kantar RS, David JA, Maliha SG, Farber SJ, et al. A Prospective, Randomized, Blinded Trial Comparing Digital Simulation to Textbook for Cleft Surgery Education. Plast Reconstr Surg. 2019;143(1):202-9.

15. Mandal I, Ojha U. Training in Interventional Radiology: A Simulation-Based Approach. J Med Educ Curric Dev. 2020;7:2382120520912744.

16. Iqbal MH, Khan O, Aydin A. Editorial Commentary: Simulation-Based Training in Orthopaedic Surgery: Current Evidence and Limitations. Arthroscopy. 2021;37(3):1008-10.

17. Miller ZA, Amin A, Tu J, Echenique A, Winokur RS. Simulation-based Training for Interventional Radiology and Opportunities for Improving the Educational Paradigm. Tech Vasc Interv Radiol. 2019;22(1):35-40.

18. Luck J, Gosling N, Saour S. Undergraduate surgical education during COVID-19: could augmented reality provide a solution? Br J Surg. 2021;108(3):e129-e30.

19. Plewan T, Mattig B, Kretschmer V, Rinkenauer G. Exploring the benefits and limitations of augmented reality for palletization. Appl Ergon. 2021;90:103250.

20. Tanzer M, Laverdiere C, Barimani B, Hart A. Augmented Reality in Arthroplasty: An Overview of Clinical Applications, Benefits, and Limitations. J Am Acad Orthop Surg. 2022;30(10):e760-e8.

21. Tagaytayan R, Kelemen A, Sik-Lanyi C. Augmented reality in neurosurgery. Arch Med Sci. 2018;14(3):572-8.

22. Gsaxner C, Pepe A, Li J, Ibrahimpasic U, Wallner J, Schmalstieg D, et al. Augmented Reality for Head and Neck Carcinoma Imaging: Description and Feasibility of an Instant Calibration, Markerless Approach. Comput Methods Programs Biomed. 2021;200:105854.

23. He B, Li Q, Zhao J, Liu R, Li Y, Xu Y. The innovation and practice of "Hand as Foot teaching method" in the teaching of motion system injury course. BMC Med Educ. 2021;21(1):553.

24. Zhang Y, Han X, Song H, Li Y. The "Hand as Foot" teaching method in clinical practice of periodontal and peri-implant surgery. Asian J Surg. 2022.
